# Supplementary material for: Softness of hydrated salt crystals under deliquescence
Source: Springer Nature journal article supplement (doi:10.1038/s41467-023-36834-0), 2023-02-25
Supplement: MOESM2 [file 41467_2023_36834_MOESM2_ESM.pdf]

## **Description of Additional Supplementary Files**

Title: Supplementary movie 1

Description: Videos of deliquescence of anhydrous sodium sulfate to the deformable state of mirabilite

Title: Supplementary Movie 2

Description: Deliquescence of NaCl
